# Supplementary material
Source: PubMed Central journal article supplement (PMC6452271)
Supplement: rstb20180106supp1.pdf [file rstb20180106supp1.pdf]

**Supplementary Table 1: Search strategy**

*Search strategy for Pubmed/MEDLINE:*

|                       | <i>Search string</i>                                                                                                                                                                                                                                                                                                                                                                                                                                                                                                                                                                                                                                                                                                                                                                                                                                                                                                                                                                                                                                                                                                                                                                                                                                                                                                                                                                                                                                                                                                                                                                                                                                                                                                                                                                                                                                                                                                                                                                                                                                                                                                                                                                                                                                                                                                                                                                                                                                                                                                                                                                                                                                                                                                                                                                                                                                                                                                                                                                                                                                                                                                                                                                                                                                                                                                                                                                                                                                                                                                                                                                                                                                                                                                                                                                                                                                                                                                                                                                                                                                                                                                                                                                                                                                                                                                                                                                                                                                                                                                                                                                                                                                                                                                                                                                                                                                                                                                                                                                               | <i># results</i> |
|-----------------------|----------------------------------------------------------------------------------------------------------------------------------------------------------------------------------------------------------------------------------------------------------------------------------------------------------------------------------------------------------------------------------------------------------------------------------------------------------------------------------------------------------------------------------------------------------------------------------------------------------------------------------------------------------------------------------------------------------------------------------------------------------------------------------------------------------------------------------------------------------------------------------------------------------------------------------------------------------------------------------------------------------------------------------------------------------------------------------------------------------------------------------------------------------------------------------------------------------------------------------------------------------------------------------------------------------------------------------------------------------------------------------------------------------------------------------------------------------------------------------------------------------------------------------------------------------------------------------------------------------------------------------------------------------------------------------------------------------------------------------------------------------------------------------------------------------------------------------------------------------------------------------------------------------------------------------------------------------------------------------------------------------------------------------------------------------------------------------------------------------------------------------------------------------------------------------------------------------------------------------------------------------------------------------------------------------------------------------------------------------------------------------------------------------------------------------------------------------------------------------------------------------------------------------------------------------------------------------------------------------------------------------------------------------------------------------------------------------------------------------------------------------------------------------------------------------------------------------------------------------------------------------------------------------------------------------------------------------------------------------------------------------------------------------------------------------------------------------------------------------------------------------------------------------------------------------------------------------------------------------------------------------------------------------------------------------------------------------------------------------------------------------------------------------------------------------------------------------------------------------------------------------------------------------------------------------------------------------------------------------------------------------------------------------------------------------------------------------------------------------------------------------------------------------------------------------------------------------------------------------------------------------------------------------------------------------------------------------------------------------------------------------------------------------------------------------------------------------------------------------------------------------------------------------------------------------------------------------------------------------------------------------------------------------------------------------------------------------------------------------------------------------------------------------------------------------------------------------------------------------------------------------------------------------------------------------------------------------------------------------------------------------------------------------------------------------------------------------------------------------------------------------------------------------------------------------------------------------------------------------------------------------------------------------------------------------------------------------------------------------------------------|------------------|
| <b>Genome editing</b> | <p>"Genetic Engineering"[Mesh] OR "Clustered Regularly Interspaced Short Palindromic Repeats"[Mesh] OR "CRISPR-cas Systems"[Mesh] OR "Zinc fingers"[Mesh] OR "Transcription Activator-Like Effector Nucleases"[Mesh]</p> <p>OR</p> <p>((Gene[tiab] OR genetic[tiab] OR genome[tiab]) AND (Engineering[tiab] OR edit[tiab] OR editing[tiab] OR enhancing[tiab] OR enhancement[tiab] OR modification[tiab] OR therapy[tiab]))</p> <p>OR</p> <p>"Zinc finger"[tiab] OR "Zinc fingers"[tiab] OR meganucleases[tiab] OR TALEN[tiab] OR "Transcription Activator-Like Effector Nucleases"[tiab] OR "Transcription Activator Like Effector Nucleases"[tiab] OR "Clustered Regularly Interspaced Short Palindromic Repeats"[tiab] OR "CRISPR"[tiab] OR "gene drive" [tiab] OR "gene drives"[tiab]</p>                                                                                                                                                                                                                                                                                                                                                                                                                                                                                                                                                                                                                                                                                                                                                                                                                                                                                                                                                                                                                                                                                                                                                                                                                                                                                                                                                                                                                                                                                                                                                                                                                                                                                                                                                                                                                                                                                                                                                                                                                                                                                                                                                                                                                                                                                                                                                                                                                                                                                                                                                                                                                                                                                                                                                                                                                                                                                                                                                                                                                                                                                                                                                                                                                                                                                                                                                                                                                                                                                                                                                                                                                                                                                                                                                                                                                                                                                                                                                                                                                                                                                                                                                                                                      | 380.201          |
| <b>Animals*</b>       | <p>"Animal experimentation"[MeSH] OR "models, animal"[MeSH] OR "animal population groups"[MeSH] OR Animals[MeSH]</p> <p>OR</p> <p>animals[tiab] OR animal[tiab] OR mice[Tiab] OR mus[Tiab] OR mouse[Tiab] OR murine[Tiab] OR woodmouse[tiab] OR rats[Tiab] OR rat[Tiab] OR murinae[Tiab] OR muridae[Tiab] OR cottonrat[tiab] OR cottonrats[tiab] OR hamster[tiab] OR hamsters[tiab] OR cricetinae[tiab] OR rodentia[Tiab] OR rodent[Tiab] OR rodents[Tiab] OR pigs[Tiab] OR pig[Tiab] OR swine[tiab] OR swines[tiab] OR piglets[tiab] OR piglet[tiab] OR boar[tiab] OR boars[tiab] OR "sus scrofa"[tiab] OR ferrets[tiab] OR ferret[tiab] OR polecat[tiab] OR polecats[tiab] OR "mustela putorius"[tiab] OR "guinea pigs"[Tiab] OR "guinea pig"[Tiab] OR cavia[Tiab] OR callithrix[Tiab] OR marmoset[Tiab] OR marmosets[Tiab] OR cebuella[Tiab] OR hapale[Tiab] OR octodon[Tiab] OR chinchilla[Tiab] OR chinchillas[Tiab] OR gerbillinae[Tiab] OR gerbil[Tiab] OR gerbils[Tiab] OR jird[Tiab] OR jirds[Tiab] OR merione[Tiab] OR meriones[Tiab] OR rabbits[Tiab] OR rabbit[Tiab] OR hares[Tiab] OR hare[Tiab] OR diptera[Tiab] OR flies[Tiab] OR fly[Tiab] OR dipteral[Tiab] OR drosophila[Tiab] OR drosophilidae[Tiab] OR cats[Tiab] OR cat[Tiab] OR carus[Tiab] OR felis[Tiab] OR nematoda[Tiab] OR nematode[Tiab] OR nematoda[Tiab] OR nematode[Tiab] OR nematodes[Tiab] OR sipunculida[Tiab] OR dogs[Tiab] OR dog[Tiab] OR canine[Tiab] OR canines[Tiab] OR canis[Tiab] OR sheep[Tiab] OR sheeps[Tiab] OR mouflon[Tiab] OR mouflons[Tiab] OR ovis[Tiab] OR goats[Tiab] OR goat[Tiab] OR capra[Tiab] OR capras[Tiab] OR rupicapra[Tiab] OR chamois[Tiab] OR haplorhini[Tiab] OR monkey[Tiab] OR monkeys[Tiab] OR anthropoidea[Tiab] OR anthropoids[Tiab] OR saguinus[Tiab] OR tamarin[Tiab] OR tamarins[Tiab] OR leontopithecus[Tiab] OR hominidae[Tiab] OR ape[Tiab] OR apes[Tiab] OR pan[Tiab] OR paniscus[Tiab] OR "pan paniscus"[Tiab] OR bonobo[Tiab] OR bonobos[Tiab] OR troglodytes[Tiab] OR "pan troglodytes"[Tiab] OR gibbon[Tiab] OR gibbons[Tiab] OR siamang[Tiab] OR siamangs[Tiab] OR nomascus[Tiab] OR symphalangus[Tiab] OR chimpanzee[Tiab] OR chimpanzees[Tiab] OR prosimians[Tiab] OR "bush baby"[Tiab] OR prosimian[Tiab] OR bush babies[Tiab] OR galagos[Tiab] OR galago[Tiab] OR pongidae[Tiab] OR gorilla[Tiab] OR gorillas[Tiab] OR pongo[Tiab] OR pygmaeus[Tiab] OR "pongo pygmaeus"[Tiab] OR orangutans[Tiab] OR pygmaeus[Tiab] OR lemur[Tiab] OR lemurs[Tiab] OR lemuriidae[Tiab] OR horse[Tiab] OR horses[Tiab] OR pongo[Tiab] OR equus[Tiab] OR cow[Tiab] OR calf[Tiab] OR bull[Tiab] OR chicken[Tiab] OR chickens[Tiab] OR gallus[Tiab] OR quail[Tiab] OR bird[Tiab] OR birds[Tiab] OR quails[Tiab] OR poultry[Tiab] OR poultries[Tiab] OR fowl[Tiab] OR fowls[Tiab] OR reptile[Tiab] OR reptilia[Tiab] OR reptiles[Tiab] OR snakes[Tiab] OR snake[Tiab] OR lizard[Tiab] OR lizards[Tiab] OR alligator[Tiab] OR alligators[Tiab] OR crocodile[Tiab] OR crocodiles[Tiab] OR turtle[Tiab] OR turtles[Tiab] OR amphibian[Tiab] OR amphibians[Tiab] OR amphibia[Tiab] OR frog[Tiab] OR frogs[Tiab] OR bombina[Tiab] OR salientia[Tiab] OR toad[Tiab] OR toads[Tiab] OR "epidalea calamita"[Tiab] OR salamander[Tiab] OR salamanders[Tiab] OR eel[Tiab] OR eels[Tiab] OR fish[Tiab] OR fishes[Tiab] OR pisces[Tiab] OR catfish[Tiab] OR catfishes[Tiab] OR siluriformes[Tiab] OR arius[Tiab] OR heteropneustes[Tiab] OR sheatfish[Tiab] OR perch[Tiab] OR perches[Tiab] OR percidae[Tiab] OR perca[Tiab] OR trout[Tiab] OR trouts[Tiab] OR char[Tiab] OR chars[Tiab] OR salvelinus[Tiab] OR "fathead minnow"[Tiab] OR minnow[Tiab] OR cyprinidae[Tiab] OR carps[Tiab] OR carp[Tiab] OR zebrafish[Tiab] OR zebrafishes[Tiab] OR goldfish[Tiab] OR goldfishes[Tiab] OR guppy[Tiab] OR guppies[Tiab] OR chub[Tiab] OR chubs[Tiab] OR tinca[Tiab] OR barbels[Tiab] OR barbus[Tiab] OR pimephales[Tiab] OR promelas[Tiab] OR "poecilia reticulata"[Tiab] OR mullet[Tiab] OR mullets[Tiab] OR seahorse[Tiab] OR seahorses[Tiab] OR mugil curema[Tiab] OR atlantic cod[Tiab] OR shark[Tiab] OR sharks[Tiab] OR catshark[Tiab] OR anguilla[Tiab] OR salmonid[Tiab] OR salmonids[Tiab] OR whitefish[Tiab] OR whitefishes[Tiab] OR salmon[Tiab] OR salmonids[Tiab] OR sole[Tiab] OR solea[Tiab] OR "sea lamprey"[Tiab] OR lamprey[Tiab] OR lampreys[Tiab] OR pumpkinseed[Tiab] OR sunfish[Tiab] OR sunfishes[Tiab] OR tilapia[Tiab] OR tilapias[Tiab] OR turbot[Tiab] OR turbot[Tiab] OR flatfish[Tiab] OR flatfishes[Tiab] OR sciuiridae[Tiab] OR squirrel[Tiab] OR squirrels[Tiab] OR chipmunk[Tiab] OR chipmunks[Tiab] OR suslik[Tiab] OR susliks[Tiab] OR vole[Tiab] OR voles[Tiab] OR lemming[Tiab] OR lemmings[Tiab] OR muskrat[Tiab] OR muskrats[Tiab] OR lemmus[Tiab] OR otter[Tiab] OR otters[Tiab] OR marten[Tiab] OR martens[Tiab] OR martes[Tiab] OR weasel[Tiab] OR badger[Tiab] OR badgers[Tiab] OR ermine[Tiab] OR mink[Tiab] OR minks[Tiab] OR sable[Tiab] OR</p> | 6.613.079        |

*The ethics of genome editing in non-human animals: A systematic review of reasons reported in the academic literature*

|                 |                                                                                                                                                                                                                                                                                                                                                                                                                                                                                                                                                                                                                                                                                                                                                                                                                                                                                                                                                                                                                                                                                  |            |
|-----------------|----------------------------------------------------------------------------------------------------------------------------------------------------------------------------------------------------------------------------------------------------------------------------------------------------------------------------------------------------------------------------------------------------------------------------------------------------------------------------------------------------------------------------------------------------------------------------------------------------------------------------------------------------------------------------------------------------------------------------------------------------------------------------------------------------------------------------------------------------------------------------------------------------------------------------------------------------------------------------------------------------------------------------------------------------------------------------------|------------|
|                 | sables[Tiab] OR gulo[Tiab] OR gulos[Tiab] OR wolverine[Tiab] OR wolverines[Tiab] OR minks[Tiab] OR mustela[Tiab] OR llama[Tiab] OR llamas[Tiab] OR alpaca[Tiab] OR alpacas[Tiab] OR camelid[Tiab] OR camelids[Tiab] OR guanaco[Tiab] OR guanacos[Tiab] OR chiroptera[Tiab] OR chiropteras[Tiab] OR bat[Tiab] OR bats[Tiab] OR fox[Tiab] OR foxes[Tiab] OR iguana[Tiab] OR iguanas[Tiab] OR xenopus laevis[Tiab] OR parakeet[Tiab] OR parakeets[Tiab] OR parrot[Tiab] OR parrots[Tiab] OR donkey[Tiab] OR donkeys[Tiab] OR mule[Tiab] OR mules[Tiab] OR zebra[Tiab] OR zebras[Tiab] OR shrew[Tiab] OR shrews[Tiab] OR bison[Tiab] OR bisons[Tiab] OR buffalo[Tiab] OR buffaloes[Tiab] OR deer[Tiab] OR deers[Tiab] OR bear[Tiab] OR bears[Tiab] OR panda[Tiab] OR pandas[Tiab] OR "wild hog"[Tiab] OR "wild boar"[Tiab] OR fitchew[Tiab] OR fitch[Tiab] OR beaver[Tiab] OR beavers[Tiab] OR jerboa[Tiab] OR jerboas[Tiab] OR capybara[Tiab] OR capybaras[Tiab]) OR wildlife [tiab] OR cattle [tiab] OR livestock [tiab] OR bovine[tiab]<br>NOT (humans[mh] NOT animals[mh:noexp]) |            |
| <b>Ethics</b>   | Ethics [Mesh] OR ethics [Subheading] OR "Morals"[Mesh:NoExp] OR "Moral Obligations"[Mesh] OR moral [tiab] OR morals [tiab] OR ethic* OR bioethic*                                                                                                                                                                                                                                                                                                                                                                                                                                                                                                                                                                                                                                                                                                                                                                                                                                                                                                                                | 248.177    |
| <b>Combined</b> | Genome editing AND animals AND ethics                                                                                                                                                                                                                                                                                                                                                                                                                                                                                                                                                                                                                                                                                                                                                                                                                                                                                                                                                                                                                                            | 968        |
|                 | Language: English and Dutch<br>Publication dates: 01-01-2010 – 27-02-2018                                                                                                                                                                                                                                                                                                                                                                                                                                                                                                                                                                                                                                                                                                                                                                                                                                                                                                                                                                                                        | <b>318</b> |

*Search strategy for Web of Science*

|                       | <i>Search string</i>                                                                                                                                                                                                                                                                                                                                                                                                                                                                                                                                                                                                                                                                                                                                                                                                                                                                                                                                                                                                                                                                                                                                                                                                                                                                                                                                                                                                                                                                                                                                                                                                                                                                                                                                                                                                                                                                                                                                                                                                                                                                                                                                                                                                                                                                                                                                                                                                                                                                                                                                                                                                                                                                                                                                                                                                                                                                                                                                                                                                                                                                                                                                                                                                                                                                                                                               | <i># results</i> |
|-----------------------|----------------------------------------------------------------------------------------------------------------------------------------------------------------------------------------------------------------------------------------------------------------------------------------------------------------------------------------------------------------------------------------------------------------------------------------------------------------------------------------------------------------------------------------------------------------------------------------------------------------------------------------------------------------------------------------------------------------------------------------------------------------------------------------------------------------------------------------------------------------------------------------------------------------------------------------------------------------------------------------------------------------------------------------------------------------------------------------------------------------------------------------------------------------------------------------------------------------------------------------------------------------------------------------------------------------------------------------------------------------------------------------------------------------------------------------------------------------------------------------------------------------------------------------------------------------------------------------------------------------------------------------------------------------------------------------------------------------------------------------------------------------------------------------------------------------------------------------------------------------------------------------------------------------------------------------------------------------------------------------------------------------------------------------------------------------------------------------------------------------------------------------------------------------------------------------------------------------------------------------------------------------------------------------------------------------------------------------------------------------------------------------------------------------------------------------------------------------------------------------------------------------------------------------------------------------------------------------------------------------------------------------------------------------------------------------------------------------------------------------------------------------------------------------------------------------------------------------------------------------------------------------------------------------------------------------------------------------------------------------------------------------------------------------------------------------------------------------------------------------------------------------------------------------------------------------------------------------------------------------------------------------------------------------------------------------------------------------------------|------------------|
| <b>Genome editing</b> | (TS=(Gene OR genetic OR genome)) AND (TS=(Engineering OR edit OR editing OR enhancing OR enhancement OR modification OR therapy))<br>OR<br>TS=("Zinc finger" OR "Zinc fingers" OR meganucleases OR TALEN OR "Transcription Activator-Like Effector Nucleases" OR "Transcription Activator Like Effector Nucleases" OR "Clustered Regularly Interspaced Short Palindromic Repeats" OR "CRISPR" OR "gene drive" OR "gene drives")                                                                                                                                                                                                                                                                                                                                                                                                                                                                                                                                                                                                                                                                                                                                                                                                                                                                                                                                                                                                                                                                                                                                                                                                                                                                                                                                                                                                                                                                                                                                                                                                                                                                                                                                                                                                                                                                                                                                                                                                                                                                                                                                                                                                                                                                                                                                                                                                                                                                                                                                                                                                                                                                                                                                                                                                                                                                                                                    | 579.482          |
| <b>Animals*</b>       | TS=(animals OR animal OR mice OR mus OR mouse OR murine OR woodmouse OR rats OR rat OR murinae OR muridae OR cottonrat OR cottonrats OR hamster OR hamsters OR cricetinae OR rodentia OR rodent OR rodents OR pigs OR pig OR swine OR swines OR piglets OR piglet OR boar OR boars OR "sus scrofa" OR ferrets OR ferret OR polecat OR polecats OR "mustela putorius" OR "guinea pigs" OR "guinea pig" OR cavia OR callithrix OR marmoset OR marmosets OR cebuella OR hapale OR octodon OR chinchilla OR chinchillas OR gerbillinae OR gerbil OR gerbils OR jird OR jirds OR merione OR meriones OR rabbits OR rabbit OR hares OR hare OR diptera OR flies OR fly OR dipteral OR drosophila OR drosophilidae OR cats OR cat OR carus OR felis OR nematoda OR nematode OR nematoda OR nematode OR nematodes OR sipunculida OR dogs OR dog OR canine OR canines OR canis OR sheep OR sheeps OR mouflon OR mouflons OR ovis OR goats OR goat OR capra OR capras OR rupicapra OR chamois OR haplorhini OR monkey OR monkeys OR anthropoidea OR anthropoids OR saguinus OR tamarin OR tamarins OR leontopithecus OR hominidae OR ape OR apes OR pan OR paniscus OR "pan paniscus" OR bonobo OR bonobos OR troglodytes OR "pan troglodytes" OR gibbon OR gibbons OR siamang OR siamangs OR nomascus OR symphalangus OR chimpanzee OR chimpanzees OR prosimians OR "bush baby" OR prosimian OR "bush babies" OR galagos OR galago OR pongidae OR gorilla OR gorillas OR pongo OR pygmaeus OR "pongo pygmaeus" OR orangutans OR pygmaeus OR lemur OR lemurs OR lemuridae OR horse OR horses OR pongo OR equus OR cow OR calf OR bull OR chicken OR chickens OR gallus OR quail OR bird OR birds OR quails OR poultry OR poultries OR fowl OR fowls OR reptile OR reptilia OR reptiles OR snakes OR snake OR lizard OR lizards OR alligator OR alligators OR crocodile OR crocodiles OR turtle OR turtles OR amphibian OR amphibians OR amphibia OR frog OR frogs OR bombina OR salientia OR toad OR toads OR "epidalea calamita" OR salamander OR salamanders OR eel OR eels OR fish OR fishes OR pisces OR catfish OR catfishes OR siluriformes OR arius OR heteropneustes OR sheatfish OR perch OR perches OR percidae OR perca OR trout OR trouts OR char OR chars OR salvelinus OR "fathead minnow" OR minnow OR cyprinidae OR carps OR carp OR zebrafish OR zebrafishes OR goldfish OR goldfishes OR guppy OR guppies OR chub OR chubs OR tinca OR barbels OR barbuis OR pimphales OR promelas OR "poecilia reticulata" OR mullet OR mullets OR seahorse OR seahorses OR "mugil curema" OR "atlantic cod" OR shark OR sharks OR catshark OR anguilla OR salmonid OR salmonids OR whitefish OR whitefishes OR salmon OR salmons OR sole OR solea OR "sea lamprey" OR lamprey OR lampreys OR pumpkinseed OR sunfish OR sunfishes OR tilapia OR tilapias OR turbot OR turbots OR flatfish OR flatfishes OR sciuridae OR squirrel OR squirrels OR chipmunk OR chipmunks OR suslik OR susliks OR vole OR voles OR lemming OR lemmings OR muskrat OR muskrats OR lemmus OR otter OR otters OR marten OR martens OR martes OR weasel OR badger OR badgers OR ermine OR mink OR minks OR sable OR sables OR gulo OR gulos OR wolverine OR wolverines OR minks OR mustela OR llama OR llamas OR alpaca OR alpacas OR camelid OR camelids OR guanaco OR guanacos | 6.782.389        |

*The ethics of genome editing in non-human animals: A systematic review of reasons reported in the academic literature*

|                 |                                                                                                                                                                                                                                                                                                                                                                                                                                                                                                  |            |
|-----------------|--------------------------------------------------------------------------------------------------------------------------------------------------------------------------------------------------------------------------------------------------------------------------------------------------------------------------------------------------------------------------------------------------------------------------------------------------------------------------------------------------|------------|
|                 | OR chiroptera OR chiropteras OR bat OR bats OR fox OR foxes OR iguana OR iguanas OR "xenopus laevis" OR parakeet OR parakeets OR parrot OR parrots OR donkey OR donkeys OR mule OR mules OR zebra OR zebras OR shrew OR shrews OR bison OR bisons OR buffalo OR buffaloes OR deer OR deers OR bear OR bears OR panda OR pandas OR "wild hog" OR "wild boar" OR fitchew OR fitch OR beaver OR beavers OR jerboa OR jerboas OR capybara OR capybaras OR wildlife OR cattle OR livestock OR bovine) |            |
| <b>Ethics</b>   | TS=(moral OR morals OR ethic* OR bioethic*)                                                                                                                                                                                                                                                                                                                                                                                                                                                      | 241.750    |
| <b>Combined</b> | Genome editing AND animals AND ethics                                                                                                                                                                                                                                                                                                                                                                                                                                                            | 676        |
| <b>Filters</b>  | Language: English and Dutch<br>Publication dates: 01-01-2010 – 27-02-2018                                                                                                                                                                                                                                                                                                                                                                                                                        | <b>325</b> |

*Search strategy for Scopus*

|                       | <i>Search string</i>                                                                                                                                                                                                                                                                                                                                                                                                                                                                                                                                                                                                                                                                                                                                                                                                                                                                                                                                                                                                                                                                                                                                                                                                                                                                                                                                                                                                                                                                                                                                                                                                                                                                                                                                                                                                                                                                                                                                                                                                                                                                                                                                                                                                                                                                                                                                                                                                                                                                                                                                                                                                                                                                                                                                                                                                                                                                                                                                                                                                                                                                                                                                                                                                                                                                                                                                                                                                                                                                                                                                                                                                                                                          | <i># results</i> |
|-----------------------|-------------------------------------------------------------------------------------------------------------------------------------------------------------------------------------------------------------------------------------------------------------------------------------------------------------------------------------------------------------------------------------------------------------------------------------------------------------------------------------------------------------------------------------------------------------------------------------------------------------------------------------------------------------------------------------------------------------------------------------------------------------------------------------------------------------------------------------------------------------------------------------------------------------------------------------------------------------------------------------------------------------------------------------------------------------------------------------------------------------------------------------------------------------------------------------------------------------------------------------------------------------------------------------------------------------------------------------------------------------------------------------------------------------------------------------------------------------------------------------------------------------------------------------------------------------------------------------------------------------------------------------------------------------------------------------------------------------------------------------------------------------------------------------------------------------------------------------------------------------------------------------------------------------------------------------------------------------------------------------------------------------------------------------------------------------------------------------------------------------------------------------------------------------------------------------------------------------------------------------------------------------------------------------------------------------------------------------------------------------------------------------------------------------------------------------------------------------------------------------------------------------------------------------------------------------------------------------------------------------------------------------------------------------------------------------------------------------------------------------------------------------------------------------------------------------------------------------------------------------------------------------------------------------------------------------------------------------------------------------------------------------------------------------------------------------------------------------------------------------------------------------------------------------------------------------------------------------------------------------------------------------------------------------------------------------------------------------------------------------------------------------------------------------------------------------------------------------------------------------------------------------------------------------------------------------------------------------------------------------------------------------------------------------------------------|------------------|
| <b>Genome editing</b> | (TITLE-ABS-KEY(Gene OR genetic OR genome)) AND TITLE-ABS-KEY (Engineering OR edit OR editing OR enhancing OR enhancement OR modification OR therapy)<br><br>OR<br><br>TITLE-ABS-KEY ("Zinc finger" OR "Zinc fingers" OR meganucleases OR TALEN OR "Transcription Activator-Like Effector Nucleases" OR "Transcription Activator Like Effector Nucleases" OR "Clustered Regularly Interspaced Short Palindromic Repeats" OR "CRISPR" OR "gene drive" OR "gene drives")                                                                                                                                                                                                                                                                                                                                                                                                                                                                                                                                                                                                                                                                                                                                                                                                                                                                                                                                                                                                                                                                                                                                                                                                                                                                                                                                                                                                                                                                                                                                                                                                                                                                                                                                                                                                                                                                                                                                                                                                                                                                                                                                                                                                                                                                                                                                                                                                                                                                                                                                                                                                                                                                                                                                                                                                                                                                                                                                                                                                                                                                                                                                                                                                         | 708.028          |
| <b>Animals*</b>       | TITLE-ABS-KEY (animals OR animal OR mice OR mus OR mouse OR murine OR woodmouse OR rats OR rat OR murinae OR muridae OR cottonrat OR cottonrats OR hamster OR hamsters OR cricetinae OR rodentia OR rodent OR rodents OR pigs OR pig OR swine OR swines OR piglets OR piglet OR boar OR boars OR "sus scrofa" OR ferrets OR ferret OR polecat OR polecats OR "mustela putorius" OR "guinea pigs" OR "guinea pig" OR cavia OR callithrix OR marmoset OR marmosets OR cebuella OR hapale OR octodon OR chinchilla OR chinchillas OR gerbillinae OR gerbil OR gerbils OR jird OR jirds OR merione OR meriones OR rabbits OR rabbit OR hares OR hare OR diptera OR flies OR fly OR dipteral OR drosophila OR drosophilidae OR cats OR cat OR carus OR felis OR nematoda OR nematode OR nematoda OR nematode OR nematodes OR sipunculida OR dogs OR dog OR canine OR canines OR canis OR sheep OR sheeps OR mouflon OR mouflons OR ovis OR goats OR goat OR capra OR capras OR rupicapra OR chamois OR haplorhini OR monkey OR monkeys OR anthropoidea OR anthropoids OR saguinus OR tamarin OR tamarins OR leontopithecus OR hominidae OR ape OR apes OR pan OR paniscus OR "pan paniscus" OR bonobo OR bonobos OR troglodytes OR "pan troglodytes" OR gibbon OR gibbons OR siamang OR siamangs OR nomascus OR symphalangus OR chimpanzee OR chimpanzees OR prosimians OR "bush baby" OR prosimian OR "bush babies" OR galagos OR galago OR pongidae OR gorilla OR gorillas OR pongo OR pygmaeus OR "pongo pygmaeus" OR orangutans OR pygmaeus OR lemur OR lemurs OR lemuriidae OR horse OR horses OR pongo OR equus OR cow OR calf OR bull OR chicken OR chickens OR gallus OR quail OR bird OR birds OR quails OR poultry OR poultries OR fowl OR fowls OR reptile OR reptilia OR reptiles OR snakes OR snake OR lizard OR lizards OR alligator OR alligators OR crocodile OR crocodiles OR turtle OR turtles OR amphibian OR amphibians OR amphibia OR frog OR frogs OR bombina OR salientia OR toad OR toads OR "epidalea calamita" OR salamander OR salamanders OR eel OR eels OR fish OR fishes OR pisces OR catfish OR catfishes OR siluriformes OR arius OR heteropneustes OR sheatfish OR perch OR perches OR percidae OR perca OR trout OR trouts OR char OR chars OR salvelinus OR "fathead minnow" OR minnow OR cyprinidae OR carps OR carp OR zebrafish OR zebrafishes OR goldfish OR goldfishes OR guppy OR guppies OR chub OR chubs OR tinca OR barbels OR barbus OR pimephales OR promelas OR "poecilia reticulata" OR mullet OR mullets OR seahorse OR seahorses OR "mugil curema" OR "atlantic cod" OR shark OR sharks OR catshark OR anguilla OR salmonid OR salmonids OR whitefish OR whitefishes OR salmon OR salmons OR sole OR solea OR "sea lamprey" OR lamprey OR lampreys OR pumpkinseed OR sunfish OR sunfishes OR tilapia OR tilapias OR turbot OR turbots OR flatfish OR flatfishes OR sciuridae OR squirrel OR squirrels OR chipmunk OR chipmunks OR suslik OR susliks OR vole OR voles OR lemming OR lemmings OR muskrat OR muskrats OR lemmus OR otter OR otters OR marten OR martens OR martes OR weasel OR badger OR badgers OR ermine OR mink OR minks OR sable OR sables OR gulo OR gulos OR wolverine OR wolverines OR minks OR mustela OR llama OR llamas OR alpaca OR alpacas OR camelid OR camelids OR guanaco OR guanacos OR chiroptera OR chiropteras OR bat OR bats OR fox OR foxes OR iguana OR iguanas OR "xenopus laevis" OR parakeet OR parakeets OR parrot OR parrots OR donkey OR donkeys OR mule OR mules OR zebra OR zebras OR shrew OR shrews OR bison OR bisons OR buffalo OR buffaloes OR deer OR deers OR bear OR bears OR | 9.320.350        |

*The ethics of genome editing in non-human animals: A systematic review of reasons reported in the academic literature*

|                 |                                                                                                                                                                                   |            |
|-----------------|-----------------------------------------------------------------------------------------------------------------------------------------------------------------------------------|------------|
|                 | panda OR pandas OR "wild hog" OR "wild boar" OR fitchew OR fitch OR beaver OR beavers OR jerboa OR jerboas OR capybara OR capybaras OR wildlife OR cattle OR livestock OR bovine) |            |
| <b>Ethics</b>   | TITLE-ABS-KEY(moral OR morals OR ethic* OR bioethics*) OR SRCTITLE (moral OR morals OR ethic* OR bioethics*)                                                                      | 459.070    |
| <b>Combined</b> | Genome editing AND animals AND ethics                                                                                                                                             | 1869       |
| <b>Filters</b>  | <b>AND NOT index(medline)</b><br>Language: English and Dutch; Publication dates: 01-01-2010 – 27-02-2018                                                                          | <b>205</b> |

*Search strategy for CAB Abstracts*

|                       | <i>Search string</i>                                                                                                                                                                                                                                                                                                                                                                                                                                                                                                                                                                                  | <i># results</i> |
|-----------------------|-------------------------------------------------------------------------------------------------------------------------------------------------------------------------------------------------------------------------------------------------------------------------------------------------------------------------------------------------------------------------------------------------------------------------------------------------------------------------------------------------------------------------------------------------------------------------------------------------------|------------------|
| <b>Genome editing</b> | Exp genetic engineering/ or gene therapy/ or transgenic animals/<br>OR<br>((Gene.ti,ab OR genetic.ti,ab OR genome.ti,ab) AND (Engineering.ti,ab OR edit.ti,ab OR editing.ti,ab OR enhancing.ti,ab OR enhancement.ti,ab OR modification.ti,ab OR therapy.ti,ab))<br>OR<br>Zinc finger.ti,ab OR Zinc fingers.ti,ab OR meganucleases.ti,ab OR TALEN.ti,ab OR Transcription Activator-Like Effector Nucleases.ti,ab OR Transcription Activator Like Effector Nucleases.ti,ab OR Clustered Regularly Interspaced Short Palindromic Repeats.ti,ab OR CRISPR.ti,ab OR gene drive.ti,ab OR gene drives.ti,ab. | 61.743           |
| <b>Ethics</b>         | Exp ethics/ OR moral values/ OR moral.ti,ab OR morals.ti,ab OR ethic*.ti,ab OR bioethics*.ti,ab OR ethical.ti,ab OR moral.jw OR morals.jn OR ethic*.jn OR bioethics*.jn                                                                                                                                                                                                                                                                                                                                                                                                                               | 19.141           |
| <b>Combined</b>       | Genome editing AND ethics                                                                                                                                                                                                                                                                                                                                                                                                                                                                                                                                                                             | 769              |
| <b>Filters</b>        | Language: English and Dutch<br>Publication dates: 01-01-2010 – 27-02-2018                                                                                                                                                                                                                                                                                                                                                                                                                                                                                                                             | <b>142</b>       |

*Search strategy for Philosopher's Index*

|                       | <i>Search string</i>                                                                                                                                                                                                                                                                                                                                                                                                                                                                                                                                                                                                                                                                                                                                                                                                                                                                                                                           | <i># results</i> |
|-----------------------|------------------------------------------------------------------------------------------------------------------------------------------------------------------------------------------------------------------------------------------------------------------------------------------------------------------------------------------------------------------------------------------------------------------------------------------------------------------------------------------------------------------------------------------------------------------------------------------------------------------------------------------------------------------------------------------------------------------------------------------------------------------------------------------------------------------------------------------------------------------------------------------------------------------------------------------------|------------------|
| <b>Genome editing</b> | ((Gene.ti,ab OR genetic.ti,ab OR genome.ti,ab) AND (Engineering.ti,ab OR edit.ti,ab OR editing.ti,ab OR enhancing.ti,ab OR enhancement.ti,ab OR modification.ti,ab OR therapy.ti,ab))<br>OR<br>Zinc finger.ti,ab OR Zinc fingers.ti,ab OR meganucleases.ti,ab OR TALEN.ti,ab OR Transcription Activator-Like Effector Nucleases.ti,ab OR Transcription Activator Like Effector Nucleases.ti,ab OR Clustered Regularly Interspaced Short Palindromic Repeats.ti,ab OR CRISPR.ti,ab OR gene drive .ti,ab OR gene drives.ti,ab                                                                                                                                                                                                                                                                                                                                                                                                                    | 712              |
| <b>Animals*</b>       | animals.ti,ab OR animal.ti,ab OR mice.ti,ab OR mus.ti,ab OR mouse.ti,ab OR murine.ti,ab OR woodmouse.ti,ab OR rats.ti,ab OR rat.ti,ab OR murinae.ti,ab OR muridae.ti,ab OR cottonrat.ti,ab OR cottonrats.ti,ab OR hamster.ti,ab OR hamsters.ti,ab OR cricetinae.ti,ab OR rodentia.ti,ab OR rodent.ti,ab OR rodents.ti,ab OR pigs.ti,ab OR pig.ti,ab OR swine.ti,ab OR swines.ti,ab OR piglets.ti,ab OR piglet.ti,ab OR boar.ti,ab OR boars.ti,ab OR "sus scrofa".ti,ab OR ferrets.ti,ab OR ferret.ti,ab OR polecat.ti,ab OR polecats.ti,ab OR "mustela putorius".ti,ab OR "guinea pigs".ti,ab OR "guinea pig".ti,ab OR cavia.ti,ab OR callithrix.ti,ab OR marmoset.ti,ab OR marmosets.ti,ab OR cebuella.ti,ab OR hapale.ti,ab OR octodon.ti,ab OR chinchilla.ti,ab OR chinchillas.ti,ab OR gerbillinae.ti,ab OR gerbil.ti,ab OR gerbils.ti,ab OR jird.ti,ab OR jirds.ti,ab OR merione.ti,ab OR meriones.ti,ab OR rabbits.ti,ab OR rabbit.ti,ab | 12.815           |

*The ethics of genome editing in non-human animals: A systematic review of reasons reported in the academic literature*

|                 |                                                                                                                                                                                                                                                                                                                                                                                                                                                                                                                                                                                                                                                                                                                                                                                                                                                                                                                                                                                                                                                                                                                                                                                                                                                                                                                                                                                                                                                                                                                                                                                                                                                                                                                                                                                                                                                                                                                                                                                                                                                                                                                                                                                                                                                                                                                                                                                                                                                                                                                                                                                                                                                                                                                                                                                                                                                                                                                                                                                                                                                                                                                                                                                                                                                                                                                                                                                                                                                                                                                                                                                                                                                                                                                                                                                                                                                                                                                                                                                                                                                                                                                                                                                                                                                                                                                                                                                                                                                                                                                                                                                                                                                                                                                                                                                                                                                                                                                                                     |           |
|-----------------|-----------------------------------------------------------------------------------------------------------------------------------------------------------------------------------------------------------------------------------------------------------------------------------------------------------------------------------------------------------------------------------------------------------------------------------------------------------------------------------------------------------------------------------------------------------------------------------------------------------------------------------------------------------------------------------------------------------------------------------------------------------------------------------------------------------------------------------------------------------------------------------------------------------------------------------------------------------------------------------------------------------------------------------------------------------------------------------------------------------------------------------------------------------------------------------------------------------------------------------------------------------------------------------------------------------------------------------------------------------------------------------------------------------------------------------------------------------------------------------------------------------------------------------------------------------------------------------------------------------------------------------------------------------------------------------------------------------------------------------------------------------------------------------------------------------------------------------------------------------------------------------------------------------------------------------------------------------------------------------------------------------------------------------------------------------------------------------------------------------------------------------------------------------------------------------------------------------------------------------------------------------------------------------------------------------------------------------------------------------------------------------------------------------------------------------------------------------------------------------------------------------------------------------------------------------------------------------------------------------------------------------------------------------------------------------------------------------------------------------------------------------------------------------------------------------------------------------------------------------------------------------------------------------------------------------------------------------------------------------------------------------------------------------------------------------------------------------------------------------------------------------------------------------------------------------------------------------------------------------------------------------------------------------------------------------------------------------------------------------------------------------------------------------------------------------------------------------------------------------------------------------------------------------------------------------------------------------------------------------------------------------------------------------------------------------------------------------------------------------------------------------------------------------------------------------------------------------------------------------------------------------------------------------------------------------------------------------------------------------------------------------------------------------------------------------------------------------------------------------------------------------------------------------------------------------------------------------------------------------------------------------------------------------------------------------------------------------------------------------------------------------------------------------------------------------------------------------------------------------------------------------------------------------------------------------------------------------------------------------------------------------------------------------------------------------------------------------------------------------------------------------------------------------------------------------------------------------------------------------------------------------------------------------------------------------------------------|-----------|
|                 | <p>OR hares.ti,ab OR hare.ti,ab OR diptera.ti,ab OR flies.ti,ab OR fly.ti,ab OR dipteral.ti,ab OR drosophila.ti,ab OR drosophilidae.ti,ab OR cats.ti,ab OR cat.ti,ab OR carus.ti,ab OR felis.ti,ab OR nematoda.ti,ab OR nematode.ti,ab OR nematoda.ti,ab OR nematode.ti,ab OR nematodes.ti,ab OR sipunculida.ti,ab OR dogs.ti,ab OR dog.ti,ab OR canine.ti,ab OR canines.ti,ab OR canis.ti,ab OR sheep.ti,ab OR sheeps.ti,ab OR mouflon.ti,ab OR mouflons.ti,ab OR ovis.ti,ab OR goats.ti,ab OR goat.ti,ab OR capra.ti,ab OR capras.ti,ab OR rupicapra.ti,ab OR chamois.ti,ab OR haplorhini.ti,ab OR monkey.ti,ab OR monkeys.ti,ab OR anthropoidea.ti,ab OR anthropoids.ti,ab OR saguinus.ti,ab OR tamarin.ti,ab OR tamarins.ti,ab OR leontopithecus.ti,ab OR hominidae.ti,ab OR ape.ti,ab OR apes.ti,ab OR pan.ti,ab OR paniscus.ti,ab OR "pan paniscus".ti,ab OR bonobo.ti,ab OR bonobos.ti,ab OR troglodytes.ti,ab OR "pan troglodytes".ti,ab OR gibbon.ti,ab OR gibbons.ti,ab OR siamang.ti,ab OR siamangs.ti,ab OR nomascus.ti,ab OR symphalangus.ti,ab OR chimpanzee.ti,ab OR chimpanzees.ti,ab OR prosimians.ti,ab OR "bush baby".ti,ab OR prosimian.ti,ab OR bush babies.ti,ab OR galagos.ti,ab OR galago.ti,ab OR pongidae.ti,ab OR gorilla.ti,ab OR gorillas.ti,ab OR pongo.ti,ab OR pygmaeus.ti,ab OR "pongo pygmaeus".ti,ab OR orangutans.ti,ab OR pygmaeus.ti,ab OR lemur.ti,ab OR lemurs.ti,ab OR lemoridae.ti,ab OR horse.ti,ab OR horses.ti,ab OR pongo.ti,ab OR equus.ti,ab OR cow.ti,ab OR calf.ti,ab OR bull.ti,ab OR chicken.ti,ab OR chickens.ti,ab OR gallus.ti,ab OR quail.ti,ab OR bird.ti,ab OR birds.ti,ab OR quails.ti,ab OR poultry.ti,ab OR poultries.ti,ab OR fowl.ti,ab OR fowls.ti,ab OR reptile.ti,ab OR reptilia.ti,ab OR reptiles.ti,ab OR snakes.ti,ab OR snake.ti,ab OR lizard.ti,ab OR lizards.ti,ab OR alligator.ti,ab OR alligators.ti,ab OR crocodile.ti,ab OR crocodiles.ti,ab OR turtle.ti,ab OR turtles.ti,ab OR amphibian.ti,ab OR amphibians.ti,ab OR amphibia.ti,ab OR frog.ti,ab OR frogs.ti,ab OR bombina.ti,ab OR salientia.ti,ab OR toad.ti,ab OR toads.ti,ab OR "epidalea calamita".ti,ab OR salamander.ti,ab OR salamanders.ti,ab OR eel.ti,ab OR eels.ti,ab OR fish.ti,ab OR fishes.ti,ab OR pisces.ti,ab OR catfish.ti,ab OR catfishes.ti,ab OR siluriformes.ti,ab OR arius.ti,ab OR heteropneustes.ti,ab OR sheatfish.ti,ab OR perch.ti,ab OR perches.ti,ab OR percidae.ti,ab OR perca.ti,ab OR trout.ti,ab OR trouts.ti,ab OR char.ti,ab OR chars.ti,ab OR salvelinus.ti,ab OR "fathead minnow".ti,ab OR minnow.ti,ab OR cyprinidae.ti,ab OR carps.ti,ab OR carp.ti,ab OR zebrafish.ti,ab OR zebrafishes.ti,ab OR goldfish.ti,ab OR goldfishes.ti,ab OR guppy.ti,ab OR guppies.ti,ab OR chub.ti,ab OR chubs.ti,ab OR tinca.ti,ab OR barbels.ti,ab OR barbuis.ti,ab OR pimphales.ti,ab OR promelas.ti,ab OR "poecilia reticulata".ti,ab OR mullet.ti,ab OR mullets.ti,ab OR seahorse.ti,ab OR seahorses.ti,ab OR mugil curema.ti,ab OR atlantic cod.ti,ab OR shark.ti,ab OR sharks.ti,ab OR catshark.ti,ab OR anguilla.ti,ab OR salmonid.ti,ab OR salmonids.ti,ab OR whitefish.ti,ab OR whitefishes.ti,ab OR salmon.ti,ab OR salmons.ti,ab OR sole.ti,ab OR solea.ti,ab OR "sea lamprey".ti,ab OR lamprey.ti,ab OR lampreys.ti,ab OR pumpkinseed.ti,ab OR sunfish.ti,ab OR sunfishes.ti,ab OR tilapia.ti,ab OR tilapias.ti,ab OR turbot.ti,ab OR turbot.ti,ab OR flatfish.ti,ab OR flatfishes.ti,ab OR sciuridae.ti,ab OR squirrel.ti,ab OR squirrels.ti,ab OR chipmunk.ti,ab OR chipmunks.ti,ab OR suslik.ti,ab OR susliks.ti,ab OR vole.ti,ab OR voles.ti,ab OR lemming.ti,ab OR lemmings.ti,ab OR muskrat.ti,ab OR muskrats.ti,ab OR lemmus.ti,ab OR otter.ti,ab OR otters.ti,ab OR marten.ti,ab OR martens.ti,ab OR martes.ti,ab OR weasel.ti,ab OR badger.ti,ab OR badgers.ti,ab OR ermine.ti,ab OR mink.ti,ab OR minks.ti,ab OR sable.ti,ab OR sables.ti,ab OR gulo.ti,ab OR gulos.ti,ab OR wolverine.ti,ab OR wolverines.ti,ab OR minks.ti,ab OR mustela.ti,ab OR llama.ti,ab OR llamas.ti,ab OR alpaca.ti,ab OR alpacas.ti,ab OR camelid.ti,ab OR camelids.ti,ab OR guanaco.ti,ab OR guanacos.ti,ab OR chiroptera.ti,ab OR chiropteras.ti,ab OR bat.ti,ab OR bats.ti,ab OR fox.ti,ab OR foxes.ti,ab OR iguana.ti,ab OR iguanas.ti,ab OR xenopus laevis.ti,ab OR parakeet.ti,ab OR parakeets.ti,ab OR parrot.ti,ab OR parrots.ti,ab OR donkey.ti,ab OR donkeys.ti,ab OR mule.ti,ab OR mules.ti,ab OR zebra.ti,ab OR zebras.ti,ab OR shrew.ti,ab OR shrews.ti,ab OR bison.ti,ab OR bisons.ti,ab OR buffalo.ti,ab OR buffaloes.ti,ab OR deer.ti,ab OR deers.ti,ab OR bear.ti,ab OR bears.ti,ab OR panda.ti,ab OR pandas.ti,ab OR "wild hog".ti,ab OR "wild boar".ti,ab OR fitchew.ti,ab OR fitch.ti,ab OR beaver.ti,ab OR beavers.ti,ab OR jerboa.ti,ab OR jerboas.ti,ab OR capybara.ti,ab OR capybaras.ti,ab OR wildlife.ti,ab OR cattle.ti,ab OR livestock.ti,ab OR bovine.ti,ab</p> |           |
| <b>Combined</b> | Genome editing AND animals                                                                                                                                                                                                                                                                                                                                                                                                                                                                                                                                                                                                                                                                                                                                                                                                                                                                                                                                                                                                                                                                                                                                                                                                                                                                                                                                                                                                                                                                                                                                                                                                                                                                                                                                                                                                                                                                                                                                                                                                                                                                                                                                                                                                                                                                                                                                                                                                                                                                                                                                                                                                                                                                                                                                                                                                                                                                                                                                                                                                                                                                                                                                                                                                                                                                                                                                                                                                                                                                                                                                                                                                                                                                                                                                                                                                                                                                                                                                                                                                                                                                                                                                                                                                                                                                                                                                                                                                                                                                                                                                                                                                                                                                                                                                                                                                                                                                                                                          | 76        |
| <b>Filters</b>  | Language: English and Dutch<br>Publication dates: 01-01-2010 – 10-04-2018                                                                                                                                                                                                                                                                                                                                                                                                                                                                                                                                                                                                                                                                                                                                                                                                                                                                                                                                                                                                                                                                                                                                                                                                                                                                                                                                                                                                                                                                                                                                                                                                                                                                                                                                                                                                                                                                                                                                                                                                                                                                                                                                                                                                                                                                                                                                                                                                                                                                                                                                                                                                                                                                                                                                                                                                                                                                                                                                                                                                                                                                                                                                                                                                                                                                                                                                                                                                                                                                                                                                                                                                                                                                                                                                                                                                                                                                                                                                                                                                                                                                                                                                                                                                                                                                                                                                                                                                                                                                                                                                                                                                                                                                                                                                                                                                                                                                           | <b>21</b> |

\* The search string for 'animals' was adapted from Hooijmans, Tillema, Leenaars & Ritskes-Hoitinga [17].
