# Supplementary material
Source: PubMed Central journal article supplement (PMC6452271)
Supplement: rstb20180106supp2.pdf [file rstb20180106supp2.pdf]

**Supplementary Table 2: Data extraction sheet**

| General information                  |                                                                                                                                    |
|--------------------------------------|------------------------------------------------------------------------------------------------------------------------------------|
| Authors, country & background author |                                                                                                                                    |
| Full reference                       |                                                                                                                                    |
| Which technology?                    |                                                                                                                                    |
| Which application?                   |                                                                                                                                    |
| Scope?                               | <i>E.g. only animals / also other species (plants/humans) mentioned in the paper? If only animals, specific animals mentioned?</i> |
| Aim(s)/general conclusion drawn      |                                                                                                                                    |

| Data extraction   |          |       |                |
|-------------------|----------|-------|----------------|
| Reasons mentioned | Page no. | Theme | Other comments |
| 1. ...            |          |       |                |
| 2. ...            |          |       |                |
| Etc. ...          |          |       |                |
